# Supplementary material for: Phosphotungstic acid on zirconia-modified silica as catalyst for oxidative desulfurization
Source: Royal Society of Chemistry journal article supplement (doi:10.1039/c6ra16622a), 2016-01-01
Supplement: c6ra16622a1.pdf [file c6ra16622a1.pdf]

## Supporting information

### **Phosphotungstic acid on zirconia-modified silica as catalysts for oxidative desulfurization**

Xiaotian Zhang <sup>a</sup>, Yunfeng Zhu <sup>a</sup>, Pengcheng Huang <sup>a</sup>, Mingyuan Zhu <sup>a, b, \*</sup>

a. School of Chemistry and Chemical Engineering of Shihezi University, Shihezi,

Xinjiang 832000, P.R. China.

b. Key Laboratory for Green Processing of Chemical Engineering of Xinjiang

Bingtuan, Shihezi, Xinjiang 832000, P.R. China.

\* Corresponding Author Phone: +86 9932057270; Fax: +86 9932057210;

E-mail: zhumin yuan@shzu.edu.cn (Mingyuan Zhu);

**Table S1. Textural properties and HPW/ZrO<sub>2</sub>-SiO<sub>2</sub> content of samples**

| catalyst                               | Surface area (m <sup>2</sup> /g) | Pore volume(cm <sup>3</sup> /g) | Pore size (nm) |
|----------------------------------------|----------------------------------|---------------------------------|----------------|
| SiO <sub>2</sub>                       | 298.5                            | 0.19                            | 2.59           |
| ZrO <sub>2</sub> -SiO <sub>2</sub>     | 278.0                            | 0.19                            | 2.71           |
| HPW-SiO <sub>2</sub>                   | 283.16                           | 0.18                            | 2.47           |
| HPW/ZrO <sub>2</sub> -SiO <sub>2</sub> | 223.82                           | 0.16                            | 2.77           |

**Table S2. The FT-IR bands observed for prepared materials. All the bands were assigned based on the literature.**

| <b>Material</b>                              | <b>Bands, <math>\nu(\text{cm}^{-1})</math></b>                                                                                                                                                                                                                                                                                                                |
|----------------------------------------------|---------------------------------------------------------------------------------------------------------------------------------------------------------------------------------------------------------------------------------------------------------------------------------------------------------------------------------------------------------------|
| <b>SiO<sub>2</sub></b>                       | broad -3500 (hydrogen bonded OH), intensive broad band at 1100–1225 (stretching of siloxanes Si–O–Si), 967 (free silanols Si–OH stretching), 800 (Si–O bending), 460 (Si–O out of plane deformation),                                                                                                                                                         |
| <b>ZrO<sub>2</sub>/ SiO<sub>2</sub></b>      | broad -3500 (hydrogen bonded OH), broad -3000 (C–H symmetric and asymmetric stretching modes of butoxy groups), diminished (almost disappeared) at 967 (stretching of Si–O–Si or/and Si–O–Zr)                                                                                                                                                                 |
| <b>HPW- SiO<sub>2</sub></b>                  | broad -3500 (hydrogen bonded OH), 967 (free silanols Si–OH stretching), 800 (Si–O bending), 460 (Si–O out of plane deformation), 1065 ( $\nu_{\text{asP-O}}$ , from the subtracted spectrum), 989 (W–O <sub>d</sub> asymmetric ligand vibration, terminal O bonded to W atom), 876 (interligand W–O <sub>b</sub> –W, edge-sharing O connected to W)           |
| <b>HPW- ZrO<sub>2</sub>/ SiO<sub>2</sub></b> | broad -3500 (hydrogen bonded OH), the band for C–H stretching (-3000) disappeared indicating the complete hydrolysis of the butoxy groups, 1065 ( $\nu_{\text{asP-O}}$ , from the subtracted spectrum), 989 (W–O <sub>d</sub> asymmetric ligand vibration, terminal O bonded to W atom), 876 (interligand W–O <sub>b</sub> –W, edge-sharing O connected to W) |
